# Supplementary material
Source: PubMed Central journal article supplement (PMC2669351)
Supplement: 0810547106_0810547106SI.pdf [file 0810547106_0810547106SI.pdf]

# Supporting Information

Finzi-Hart et al. 10.1073/pnas.0810547106

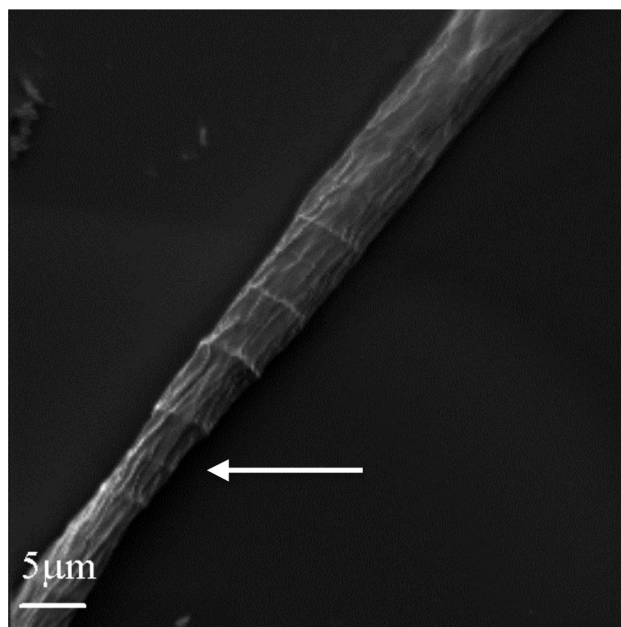

**Fig. S1.** Nanometer-scale secondary ion mass spectrometry (NanoSIMS) secondary electron image ( $50 \mu\text{m}^2$ ) of a *Trichodesmium* trichome. The arrow indicates a potential "break point," a region of thinning cells with relatively low uptake activity.

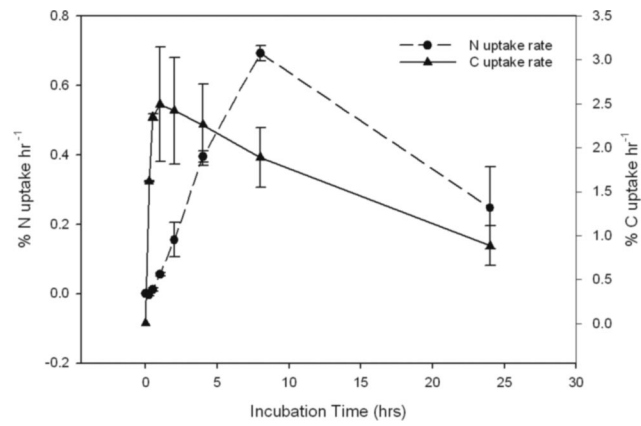

**Fig. S2.**  $^{15}\text{N}$  and  $^{13}\text{C}$  fixation rates (percentage uptake  $\text{hour}^{-1}$ ) in *Trichodesmium* cells during a 24-h isotope labeling experiment. Data are generated from bulk IRMS analysis of pelleted cells sampled at 8 time points. Error bars represent 2 sigma error.

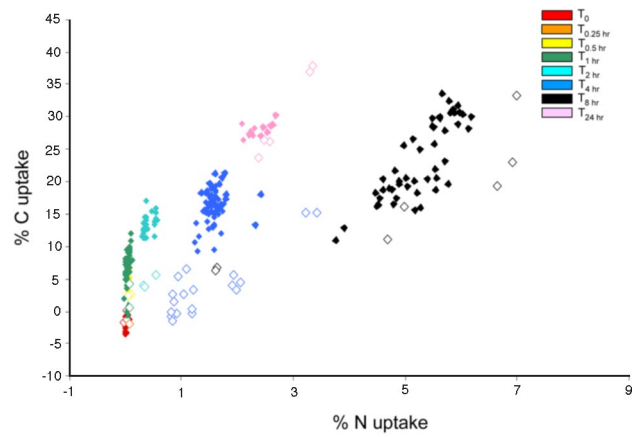

**Fig. S3.** Percentage  $^{13}\text{C}$  and  $^{15}\text{N}$  uptake at 8 time points in *Anabaena oscillarioides* cells analyzed by NanoSIMS, following stable isotope labeling with  $\text{H}^{13}\text{CO}_3$  and  $^{15}\text{N}_2$ . Data points represent average values for individual cells measured along a single trichome by NanoSIMS. Time points are shown for both vegetative cells (filled diamonds) and heterocysts (open diamonds).
